# Supplementary material
Source: Springer Nature journal article supplement (https://www.springermedizin.de/resource/supplementary/13017_2008_99_MOESM2_ESM.pdf/9635466)

**Sodium**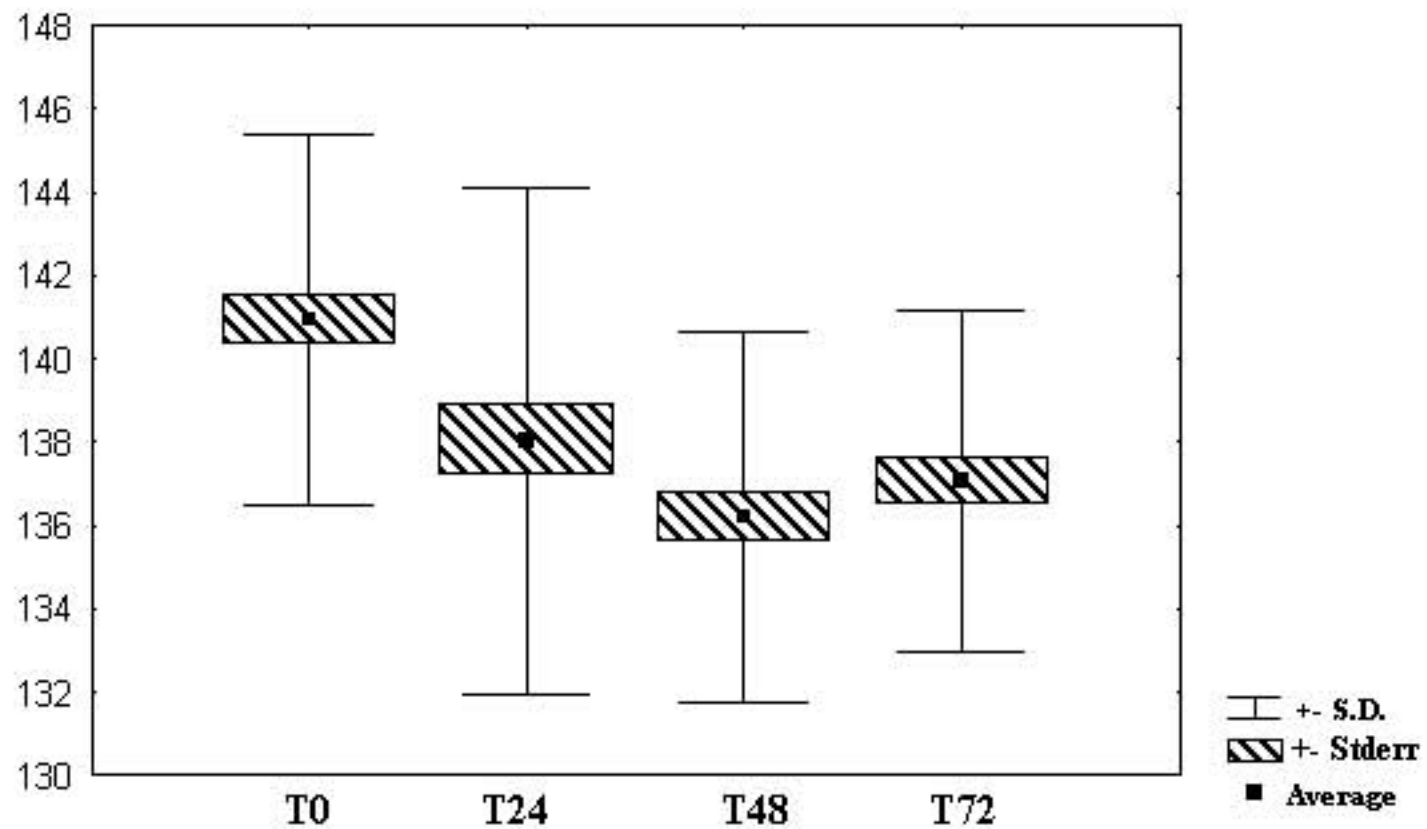**Potassium**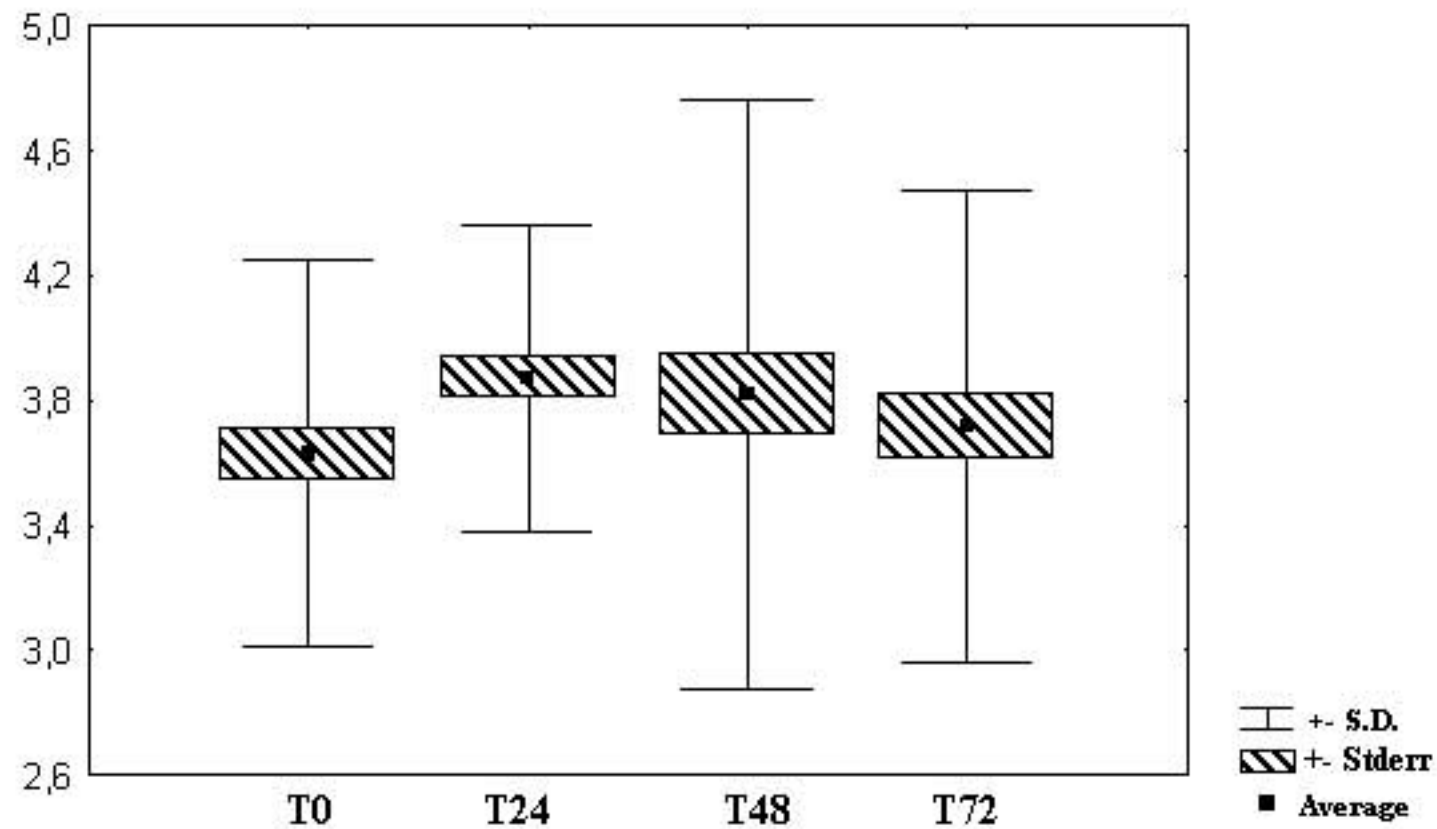

Supplement: MOESM2 [file 9635466]
